# Supplementary material for: Flexible Coupling of Respiration and Vocalizations with Locomotion and Head Movements in the Freely Behaving Rat
Source: Hindawi journal article supplement (doi:10.1155/2016/4065073), 2016-01-01
Supplement: f1 [file 4065073.f1.zip]

# Flexible coupling of respiration and vocalizations with locomotion and head movements in the freely behaving rat

Alves, Joseph Andrew<sup>†</sup>, Boerner, Barbara Ciralli<sup>†</sup>, Laplagne, Diego Andrés\*

Brain Institute, Federal University of Rio Grande do Norte, Natal, Brazil

\* Correspondence: Diego A. Laplagne, [dlaplagne@neuro.ufrn.br](mailto:dlaplagne@neuro.ufrn.br)

<sup>†</sup> These authors contributed equally to this work

## Supplementary material

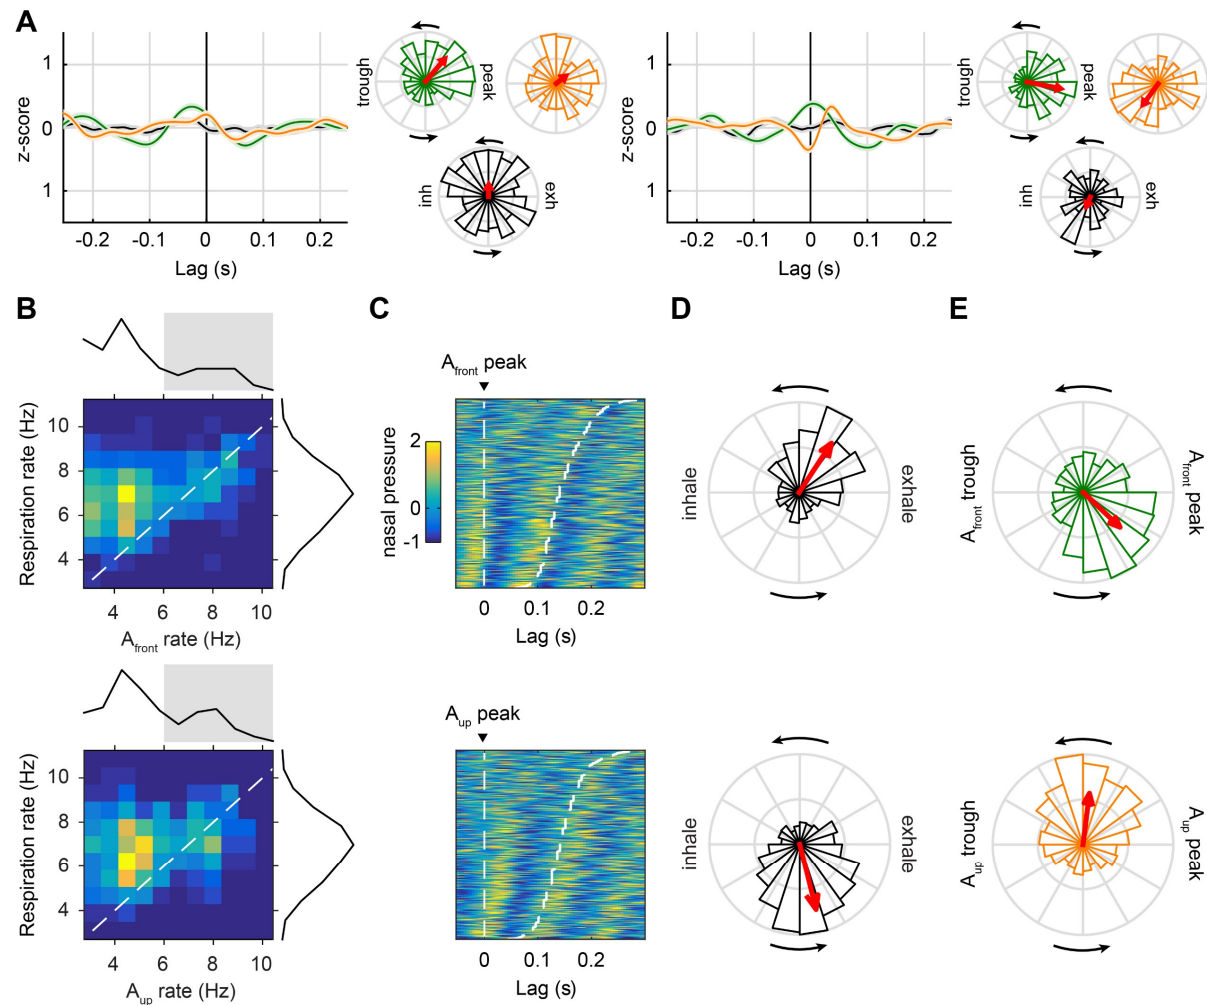

## Supplementary Figure 1. Sniffing while walking

**A.** Alignment of respiration and acceleration signals to footsteps from hind (left panels) and forelimbs (right panels) as in Figure 4B (PLV for  $A_{front}$  and  $A_{up}$  at hindfeet timestamps = 0.27 and 0.13,  $p \approx 0$  and 0.04,  $N = 287$  steps; PLV for  $A_{front}$  and  $A_{up}$  at fore feet timestamps = 0.30 and 0.19,  $p \approx 0$  and  $< 0.0001$ ,  $N = 305$  steps; PLV for respiration at the times of hind and fore feet = 0.09 and 0.10,  $p = 0.5$  and 0.3).

Notice the lower synchrony of steps with head acceleration during sniffing while walking than during walking (Figure 4B). **B.** Joint distribution of mean respiratory rate and head acceleration rate for each sniffing-while-walking episode with marginal distributions on the sides (top:  $A_{\text{front}}$ ; bottom:  $A_{\text{up}}$ , as in Figure 4C). Gray shading in the acceleration marginal distribution represent the cases included in the analysis in C-E. **C.** Alignment of respiration to all acceleration peaks detected in the analyzed sniffing-while-walking bouts (As in Figure 4D). **D.** Phase locking of the respiratory cycle to the acceleration peaks (PLVs for respiration at peaks of  $A_{\text{front}}$  and  $A_{\text{up}}$  = 0.33 and 0.38,  $p \approx 0$  for both,  $N = 1151$  and 1087 cycles). **E.** Phase locking of the acceleration cycles to the peak of exhalation (PLVs for  $A_{\text{front}}$  and  $A_{\text{up}}$  at exhalation peaks = 0.28 and 0.29,  $p \approx 0$  for both,  $N = 1151$  and 1289 cycles). Notice the better alignment of all signals during sniffing while walking when compared to walking (Figure 4D-F). Of note, coupling was also higher than during sniffing while staying in place (Figure 3C-E).

### Supplementary videos

Example episodes of sniffing behavior, walking, trotting and galloping (Supplementary Videos 1, 2, 3 and 4). Top: frames from high-speed video (200 fps). The headstage is seen protected with polystyrene foam. Bottom: simultaneous recordings of intranasal pressure ('Sniff', blue), horizontal acceleration  $A_{\text{front}}$  ('Front/Back', dark orange) and vertical acceleration  $A_{\text{up}}$  ('Up/Down', orange). The time axis spans 2 seconds and time 0 corresponds to the video frame being shown. Respiratory cycles with emission of vocalizations show a period of near-zero pressure following the end of the inhalation phase, some of them with high-frequency fluctuations. Videos are slowed down 20 times.
