# Supplementary material for: Flexible Coupling of Respiration and Vocalizations with Locomotion and Head Movements in the Freely Behaving Rat
Source: Neural Plast. 2016 Jul 25;2016:4065073. doi: 10.1155/2016/4065073 (PMC4976156; doi:10.1155/2016/4065073)
Supplement: Supplementary file 1 — Supplementary Material includes one figure and four videos. Supplementary Figure 1 analyzes the coupling of respiration to head movements while the rats perform sniffing behavior while walking. Supplementary videos 1 to 4 are examples episodes of sniffing, walking, trotting and galloping behavior respectively. [file 4065073.f1.zip]

Archive with 6 entries (5 files):
- 4065073  Mat/
- 4065073  Mat/Supplementary Material - Flexible coupling of respiration and vocalizations with locomotion and head movements in the freely behaving rat.pdf
- 4065073  Mat/SuppVideo1.mp4
- 4065073  Mat/SuppVideo2.mp4
- 4065073  Mat/SuppVideo3.mp4
- 4065073  Mat/SuppVideo4.mp4
